# Supplementary material for: Traveling waves propagating through coupled microbeads in the Belousov–Zhabotinsky reaction
Source: Royal Society of Chemistry journal article supplement (doi:10.1039/d1cp03916d), 2021-01-01
Supplement: d1cp03916d9.pdf [file d1cp03916d9.pdf]

## Supplementary Information (SI)

### Traveling Waves Propagating through Coupled Microbeads

#### in the Belousov-Zhabotinsky Reaction

Masakazu Kuze,<sup>a</sup> Hiroyuki Kitahata<sup>b</sup> and Satoshi Nakata<sup>\*a</sup>

<sup>a</sup> Graduate School of Integrated Sciences for Life, Hiroshima University, Kagamiyama 1-3-1,  
Higashi-Hiroshima 739-8526, Japan

<sup>b</sup> Graduate School of Science, Chiba University, Yayoi-cho 1-33, Inage-ku, Chiba 263-8522,  
Japan.

### **A. Movies for the experimental results in Figure 2**

Movie S1. Movie of oscillations for the 2D-3D coupling at the minimum distance between the two beads,  $l = 0$  mm ( $\times 10$  speed)

Movie S2. Movie of oscillations for the 2D-3D coupling at  $l = 0.12$  mm ( $\times 10$  speed)

Movie S3. Movie of oscillations for the 2D-3D coupling at  $l = 1$  mm ( $\times 10$  speed)

### **B. Movies for the experimental results in Figure 3**

Movie S4. Movie of oscillations for the 3D-3D coupling at  $l = 0$  mm ( $\times 10$  speed)

Movie S5. Movie of oscillations for the 3D-3D coupling at  $l = 0.11$  mm ( $\times 10$  speed)

Movie S6. Movie of oscillations for the 3D-3D coupling at  $l = 1$  mm ( $\times 10$  speed)

### **C. Movies for the numerical results in Figure 4**

Movie S7. Movie of oscillations for the 2D-3D coupling at  $l = 0$  mm

Movie S8. Movie of oscillations for the 3D-3D coupling at  $l = 0$  mm
